# Supplementary material for: Transcranial direct current stimulation (tDCS) for improving capacity in activities and arm function after stroke: a network meta-analysis of randomised controlled trials
Source: Springer Nature journal article supplement (doi:10.1186/s12984-017-0301-7), 2017-09-13
Supplement: MOESM2 [file 15056606]

***Additional file 2: characteristics of studies examining the effects of tDCS on activities, arm function and acceptability***

| Study-ID                    | Design and sample size                                                 | EXP mean age (SD), years | CTL mean age (SD), years | EXP mean time post-stroke (SD) | CTL mean time post-stroke (SD) | Stimulation variables                                                                                                                                                                                                                                                                                                                                                               | Control Intervention      | Base treatment                                                                               | Outcomes                                        |
|-----------------------------|------------------------------------------------------------------------|--------------------------|--------------------------|--------------------------------|--------------------------------|-------------------------------------------------------------------------------------------------------------------------------------------------------------------------------------------------------------------------------------------------------------------------------------------------------------------------------------------------------------------------------------|---------------------------|----------------------------------------------------------------------------------------------|-------------------------------------------------|
| Allman et al., 2016 [44]    | RCT;<br>Anodal: 11<br>Sham: 13                                         | 67 (10)                  | 60 (12)                  | 57 (40) months                 | 51 (33) months                 | 20 min with 1 mA of anodal tDCS with the anode placed over the M1 of the affected hemisphere<br>Reference electrode position: over the contralateral supraorbital forehead<br>Treatment was delivered on 9 consecutive working days                                                                                                                                                 | Sham tDCS (1 mA for 10 s) | Graded Repetitive Arm Supplementary Program (GRASP) for 60 min on 9 consecutive working days | ARAT, WMFT, UE-FM, fMRI                         |
| Ang et al., 2012 [60]       | RCT;<br>Dual: 10<br>Sham: 9                                            | 52 (12)                  | 56 (10)                  | 3 (2) years                    | 3 (1) years                    | 20 min with 1 mA of dual tDCS with the anode placed over the M1 of the affected hemisphere and the cathode placed over the M1 of the unaffected hemisphere (size not stated)<br>Stimulation was delivered 5 times a week for 2 weeks                                                                                                                                                | Sham tDCS (1 mA for 30 s) | 60 min of therapy with the MIT-Manus arm robot 5 times a week for 2 weeks                    | UE-FM                                           |
| Au-Yeung et al., 2014 [61]  | Randomised cross-over trial;<br>Anodal: 10<br>Cathodal: 10<br>Sham: 10 | 63 (6)                   |                          | 8 (3) years                    |                                | Anodal: 20 min with 1 mA with 35 cm <sup>2</sup> anodal electrode over the M1 of the lesioned hemisphere<br>Cathodal: 20 min with 1 mA with 35 cm <sup>2</sup> cathodal electrode over the M1 of the non-lesioned hemisphere<br>Reference electrode position: over the contralateral supraorbital forehead<br>Stimulation was delivered once with at least 5 days of resting period | Sham tDCS (1 mA for 10 s) | None                                                                                         | PPT, Pinch grip strength                        |
| Boggio et al., 2007 [50]    | Randomised cross-over trial;<br>Anodal: 2<br>Cathodal: 1<br>Sham: 1    | 56 (11)                  | 75 (NA)                  | 33 (34) months                 | 39 (NA) months                 | Anodal: 20 min with 1 mA with 35 cm <sup>2</sup> anodal electrode over the M1 of the lesioned hemisphere<br>Cathodal: 20 min with 1 mA with 35 cm <sup>2</sup> cathodal electrode over the M1 of the non-lesioned hemisphere<br>Reference electrode position: over the contralateral supraorbital forehead<br>Stimulation was delivered once a day for 4 days                       | Sham tDCS (1 mA for 30 s) | None                                                                                         | JTT                                             |
| Bolognini et al., 2011 [27] | RCT;<br>Anodal: 10<br>Sham: 11                                         | 43 (13)                  | 51 (15)                  | 44 (31) months                 | 26 (18) months                 | 20 min with 1 mA with 35 cm <sup>2</sup> anodal electrode over the M1 of the lesioned hemisphere<br>Stimulation was delivered 5 days a week for 2 consecutive weeks                                                                                                                                                                                                                 | Sham tDCS (2 mA for 30 s) | CIMT up to 4 hours/day for 5 days a week for 2 consecutive weeks                             | JTT, handgrip strength, MAL, UE-FM, questionnai |

|                              |                                                                                |               |         |                |               |                                                                                                                                                                                                                                                                                                                                                                           |                                                                                                                   |                                                                               |                                                                                         |
|------------------------------|--------------------------------------------------------------------------------|---------------|---------|----------------|---------------|---------------------------------------------------------------------------------------------------------------------------------------------------------------------------------------------------------------------------------------------------------------------------------------------------------------------------------------------------------------------------|-------------------------------------------------------------------------------------------------------------------|-------------------------------------------------------------------------------|-----------------------------------------------------------------------------------------|
|                              |                                                                                |               |         |                |               |                                                                                                                                                                                                                                                                                                                                                                           |                                                                                                                   |                                                                               | re for adverse effects                                                                  |
| Cha et al., 2014 [39]        | RCT;<br>Anodal: 10<br>Active Control: 10                                       | 60 (11)       | 58 (10) | 14 (5) months  | 15 (4) months | 20 min with 1 mA with 35 cm <sup>2</sup> anodal electrode over the M1 of the lesioned hemisphere<br>Reference electrode position: over the contralateral supraorbital forehead<br>Stimulation was delivered 5 days a week for 4 weeks                                                                                                                                     | Basic training for improving function of upper and lower extremities for 30 min a day, 5 times a week for 4 weeks |                                                                               | UE-FM, grip strength                                                                    |
| DiLazzaro et al., 2014a [28] | RCT;<br>Dual: 7<br>Sham: 7                                                     | 66 (16)       | 71 (14) | 3 (1) days     | 3 (1) days    | 40 min with 2 mA with 35 cm <sup>2</sup> with the anode over the M1 of the lesioned hemisphere and cathode over the M1 of the non-lesioned hemisphere<br>Stimulation was delivered 5 on consecutive days                                                                                                                                                                  | Sham tDCS (2 mA for 30 s)                                                                                         | None                                                                          | ARAT, 9HPT, handgrip strength, MAL, NIHSS, mRS, adverse events                          |
| DiLazzaro et al., 2014b [29] | RCT;<br>Dual: 10<br>Sham: 10                                                   | 61 (16)       | 69 (12) | 3 (2) days     | 3 (1) days    | 40 min with 2 mA with 35 cm <sup>2</sup> with the anode over the M1 of the lesioned hemisphere and cathode over the M1 of the non-lesioned hemisphere<br>Stimulation was delivered 5 on consecutive days                                                                                                                                                                  | Sham tDCS (2 mA for 30 s)                                                                                         | CIMT for at least 90% of waking hours, including 1.5 hours a day arm training | ARAT, 9HPT, handgrip strength, MAL, NIHSS, mRS, adverse events, functional imaging data |
| Fregni et al., 2005 [62]     | Randomised cross-over trial;<br>Anodal: 6<br>Cathodal: 6<br>Sham: 6            | 54 (17) years |         | 27 (24) months |               | Anodal: 20 min with 1 mA with 35 cm <sup>2</sup> anodal electrode over the M1 of the lesioned hemisphere<br>Cathodal: 20 min with 1 mA with 35 cm <sup>2</sup> cathodal electrode over the M1 of the non-lesioned hemisphere<br>Stimulation was delivered once with at least 48 h resting period                                                                          | Sham tDCS (1 mA for 30 s)                                                                                         | None                                                                          | JTT                                                                                     |
| Fusco et al., 2013 [51]      | Randomised cross-over trial;<br>Anodal: 9<br>Cathodal: 9<br>Dual: 9<br>Sham: 9 | 44 (16)       | 65 (22) | 31 (13) days   | 25 (5) days   | Anodal: 15 min with 1.5 mA with 35 cm <sup>2</sup> anodal electrode over the M1 of the lesioned hemisphere<br>Cathodal: 15 min with 1.5 mA with 35 cm <sup>2</sup> cathodal electrode over the M1 of the non-lesioned hemisphere<br>Dual: 15 min with 1.5 mA with 35 cm <sup>2</sup> with the anode over the M1 of the lesioned hemisphere and cathode over the M1 of the | Sham tDCS (not described by the authors)                                                                          | None                                                                          | 9HPT-index, maximum pinch and grasp force, patient satisfaction                         |

|                         |                                                        |         |         |              |             |                                                                                                                                                                                                                                                                                                                                                                               |                                          |                                                                                                                        |                                                                          |
|-------------------------|--------------------------------------------------------|---------|---------|--------------|-------------|-------------------------------------------------------------------------------------------------------------------------------------------------------------------------------------------------------------------------------------------------------------------------------------------------------------------------------------------------------------------------------|------------------------------------------|------------------------------------------------------------------------------------------------------------------------|--------------------------------------------------------------------------|
|                         |                                                        |         |         |              |             | non-lesioned hemisphere<br>Reference electrode position: over the contralateral supraorbital forehead<br>Active stimulation and sham stimulation were delivered alternately on 2 consecutive days                                                                                                                                                                             |                                          |                                                                                                                        |                                                                          |
| Fusco et al., 2014 [40] | RCT;<br>Cathodal: 5<br>Sham: 6                         | 56 (15) | 60 (12) | 19 (8) days  |             | 10 min with 1.5 mA with 35 cm <sup>2</sup> cathodal electrode over the M1 of the non-lesioned hemisphere<br>Reference electrode position: above the right shoulder<br>Stimulation was delivered 5 times a week for 2 weeks                                                                                                                                                    | Sham tDCS (not described by the authors) | 45 min of individualised motor rehabilitation focusing on recovery of upper limb twice a day                           | Canadian Neurological Scale, BI, 9HPT, grasp and pinch force, UE-FM, RMI |
| Hesse et al., 2011 [30] | RCT;<br>Anodal: 32<br>Cathodal: 32<br>Sham: 32         | 65 (10) | 66 (10) | 4 (2) weeks  | 4 (2) weeks | Anodal: 20 min with 2 mA with 35 cm <sup>2</sup> anodal electrode over the M1 of the lesioned hemisphere<br>Cathodal: 20 min with 2 mA with 35 cm <sup>2</sup> cathodal electrode over the M1 of the non-lesioned hemisphere<br>Reference electrode position: over the contralateral supraorbital forehead<br>Stimulation was delivered 5 days a week for 6 consecutive weeks | Sham tDCS (0 mA for 20 s)                | 20 min of robot-assisted arm training with the Bi-Manu-Track system 5 days a week for 6 consecutive weeks              | UE-FM, BI, muscle strength, muscle tone, BBT                             |
| Khedr et al., 2013 [31] | RCT;<br>Anodal: 14<br>Cathodal: 13<br>Sham: 13         | 59 (9)  | 57 (8)  | 13 (5) days  | 13 (5) days | Anodal: 25 min with 2 mA with 35 cm <sup>2</sup> anodal electrode over the M1 of the lesioned hemisphere<br>Cathodal: 25 min with 2 mA with 35 cm <sup>2</sup> cathodal electrode over the M1 of the non-lesioned hemisphere<br>Reference electrode position: over the contralateral supraorbital forehead<br>Stimulation was delivered for 6 consecutive days                | Sham tDCS (2 mA for 2 min)               | Passive movement and range of motion exercise up to active resistive exercise within 1 hour after tDCS                 | NIHSS, OMCASS, BI, muscle strength, cortical excitability                |
| Kim et al., 2009 [63]   | Randomised cross-over trial;<br>Anodal: 10<br>Sham: 10 | 63 (13) |         | 6 (3) weeks  |             | 20 min with 1 mA with 35 cm <sup>2</sup> anodal electrode over the M1 of the lesioned hemisphere<br>Reference electrode position: over the contralateral supraorbital forehead<br>Stimulation was delivered once, separated by at least 24 h of resting period                                                                                                                | Sham tDCS (1 mA for 30 s)                | None                                                                                                                   | BBT, VAS for fatigue                                                     |
| Kim et al., 2010 [32]   | RCT;<br>Anodal: 7<br>Cathodal: 6<br>Sham: 7            | 54 (15) | 63 (9)  | 27 (21) days | 23 (8) days | Anodal: 20 min with 2 mA with 35 cm <sup>2</sup> anodal electrode over the M1 of the lesioned hemisphere<br>Cathodal: 20 min with 2 mA with 35 cm <sup>2</sup> cathodal electrode over the M1 of the non-lesioned hemisphere<br>Reference electrode position: over the contralateral supraorbital forehead                                                                    | Sham tDCS (2 mA for 1 min)               | 30 min of standardised occupational therapy to improve paretic hand function for 5 days a week for 2 consecutive weeks | UE-FM                                                                    |

|                              |                                                                                                      |         |         |                          |                          |                                                                                                                                                                                                                                                                                                                                                                                                                                                                                                                                                                                                                                                                                                                                                                                     |                                                                                                                                    |                                                                                                                                                                                                                |                         |
|------------------------------|------------------------------------------------------------------------------------------------------|---------|---------|--------------------------|--------------------------|-------------------------------------------------------------------------------------------------------------------------------------------------------------------------------------------------------------------------------------------------------------------------------------------------------------------------------------------------------------------------------------------------------------------------------------------------------------------------------------------------------------------------------------------------------------------------------------------------------------------------------------------------------------------------------------------------------------------------------------------------------------------------------------|------------------------------------------------------------------------------------------------------------------------------------|----------------------------------------------------------------------------------------------------------------------------------------------------------------------------------------------------------------|-------------------------|
|                              |                                                                                                      |         |         |                          |                          | Stimulation was delivered 5 days a week for 2 consecutive weeks                                                                                                                                                                                                                                                                                                                                                                                                                                                                                                                                                                                                                                                                                                                     |                                                                                                                                    |                                                                                                                                                                                                                |                         |
| Lee et al., 2014 [33]        | RCT;<br>Cathodal: 21<br>Active control: 22<br>Cathodal + active control: 21                          | 62 (11) | 61 (14) | 18 (8) days              | 17 (6) days              | 20 min with 2 mA with 25 cm <sup>2</sup> cathodal electrode over the M1 of the non-lesioned hemisphere<br>Reference electrode position: over the contralateral supraorbital forehead<br>Stimulation was delivered 5 days a week for 3 weeks                                                                                                                                                                                                                                                                                                                                                                                                                                                                                                                                         | Virtual reality solely for 30 minutes a day, 5 times a week for 3 weeks                                                            | Cathodal: occupational therapy for 30 min a day, 5 times a week for 3 weeks<br>Cathodal + active control and virtual reality only groups: virtual reality therapy for 30 min a day, 5 times a week for 3 weeks | MAS, MMT, UE-FM, K-MBI  |
| Lindenberg et al., 2010 [41] | RCT;<br>Dual: 10<br>Sham: 10                                                                         | 62 (15) | 56 (13) | 31 (21)                  | 40 (23)                  | 30 min with 1.5 mA with 16.3 cm <sup>2</sup> anode over the M1 of the lesioned hemisphere and cathode over the M1 of the non-lesioned hemisphere<br>Stimulation was delivered on 5 consecutive days                                                                                                                                                                                                                                                                                                                                                                                                                                                                                                                                                                                 | Sham tDCS (1.5 mA for 30 s)                                                                                                        | 60 min of physical and occupational therapy on 5 consecutive days, including functional motor tasks                                                                                                            | UE-FM, WMFT             |
| Mahmoudi et al., 2011 [64]   | Randomised cross-over trial;<br>Anodal A: 10<br>Anodal B: 10<br>Cathodal: 10<br>Dual: 10<br>Sham: 10 | 61 (14) |         | 8 (5) months             |                          | Anodal A: 20 min with 1 mA with 35 cm <sup>2</sup> anodal electrode over the M1 of the lesioned hemisphere and the reference electrode over the contralateral orbit<br>Anodal B: 20 min with 1 mA with 35 cm <sup>2</sup> anodal electrode over the M1 of the lesioned hemisphere and the reference electrode on the contralateral deltoid muscle<br>Cathodal: 20 min with 1 mA with 35 cm <sup>2</sup> cathodal electrode over the M1 of the non-lesioned hemisphere and the reference electrode on the contralateral deltoid muscle<br>Dual: 20 min with 1 mA with 35 cm <sup>2</sup> with the anode over the M1 of the lesioned hemisphere and cathode over the M1 of the non-lesioned hemisphere<br>Each stimulation type was delivered once with at least 96 h resting period. | Sham tDCS (1 mA for 30 s)                                                                                                          | None                                                                                                                                                                                                           | JTT                     |
| Mortensen et al., 2016 [53]  | RCT;<br>Anodal: 8<br>Sham: 7                                                                         | 66 (11) | 61 (10) | 32 (16) months           | 29 (15) months           | 20 min with 1 mA with 35 cm <sup>2</sup> anodal electrode over the M1 of the lesioned hemisphere and the reference electrode over the contralateral orbit<br>Treatment was delivered on 5 consecutive days                                                                                                                                                                                                                                                                                                                                                                                                                                                                                                                                                                          | Sham tDCS (30 s with 1 mA max.)                                                                                                    | 30 min of home-based occupational therapy                                                                                                                                                                      | JTT, grip strength, SIS |
| Nair et al., 2011 [47]       | RCT;<br>Cathodal: 7<br>Sham: 7                                                                       | 61 (12) | 56 (15) | 33 (20) months           | 28 (28) months           | 30 min with 1 mA with cathodal electrode over the M1 of the non-lesioned hemisphere and the reference electrode on the contralateral deltoid muscle<br>Stimulation was delivered on 5 consecutive days                                                                                                                                                                                                                                                                                                                                                                                                                                                                                                                                                                              | Sham tDCS (not described by the authors)                                                                                           | 60 min of occupational therapy for 5 consecutive days                                                                                                                                                          | 3J-ROM, change in UE-FM |
| Qu et al., 2009 [34]         | RCT;<br>Cathodal: 25                                                                                 | 45 (11) | 45 (14) | 6 (range 3 to 36) months | 4 (range 3 to 12) months | 20 min with 0.5 mA with cathodal electrode over the M1 of the non-lesioned hemisphere<br>Reference electrode position: unclear                                                                                                                                                                                                                                                                                                                                                                                                                                                                                                                                                                                                                                                      | Physical therapy according to the Bobath, Brunnstrom and Rood approaches for 40 min twice a day for 5 consecutive days for 4 weeks |                                                                                                                                                                                                                | BI, MAS, UE-FM          |

|                                   |                                             |                                                                       |                                           |                                                                                   |                                                  |                                                                                                                                                                                                                                                                                                                                                                              |                           |                                                                                                                               |                                                        |
|-----------------------------------|---------------------------------------------|-----------------------------------------------------------------------|-------------------------------------------|-----------------------------------------------------------------------------------|--------------------------------------------------|------------------------------------------------------------------------------------------------------------------------------------------------------------------------------------------------------------------------------------------------------------------------------------------------------------------------------------------------------------------------------|---------------------------|-------------------------------------------------------------------------------------------------------------------------------|--------------------------------------------------------|
|                                   | Sham: 25                                    |                                                                       |                                           |                                                                                   |                                                  | Stimulation was delivered 5 days a week for 4 weeks                                                                                                                                                                                                                                                                                                                          |                           |                                                                                                                               |                                                        |
| Rocha et al., 2016 [45]           | RCT;<br>Anodal: 7<br>Cathodal: 7<br>Sham: 7 | 58 (range 41-71)                                                      | 59 (range 46-70)                          | 31 months (range 9-67)                                                            | 27 months (6-46)                                 | Anodal: 13 min with 1 mA with 35 cm <sup>2</sup> anodal electrode over the M1 of the lesioned hemisphere<br>Cathodal: 9 min with 1 mA with 35 cm <sup>2</sup> cathodal electrode over the M1 of the non-lesioned hemisphere<br>Reference electrode position: over the contralateral supraorbital forehead<br>Stimulation was delivered 5 days a week for 2 consecutive weeks | Sham tDCS (1 mA for 30 s) | Modified CIMT for 6 consecutive hours each day for 4 weeks plus 1 h gross and fine motor activities training per day          | UE-FM, MAL, handgrip strength                          |
| Rossi et al., 2013 [42]           | RCT;<br>Anodal: 25<br>Sham: 25              | 66 (14)                                                               | 70 (14)                                   | 2 days                                                                            | 2 days                                           | 20 min with 2 mA with anodal electrode over the M1 of the lesioned hemisphere<br>Reference electrode position: over the contralateral supraorbital forehead<br>Stimulation was delivered on 5 consecutive days                                                                                                                                                               | Sham tDCS (2 mA for 30 s) | Not described by the authors                                                                                                  | NIHSS, UE-FM                                           |
| Sattler et al., 2015 [46]         | RCT;<br>Anodal: 10<br>Sham: 10              | 68 (10)                                                               | 63 (12)                                   | 5 (3) days                                                                        | 6 (4) days                                       | 13 min with 1.2 mA with anodal electrode over the M1 of the lesioned hemisphere<br>Reference electrode position: over the contralateral supraorbital forehead<br>Stimulation was delivered on 5 consecutive days                                                                                                                                                             | 1.2 mA for 60 s           | rPNS for 13 min on 5 consecutive days + occupational therapy 3 to 5 times a week for 30 min                                   | JTT, handgrip strength, 9HPT, hand tapping test, UE-FM |
| Sik et al., 2015 [54]             | RCT;<br>Anodal: 10<br>Dual: 10<br>Sham: 11  | Median (25th-75th percentile): Anodal: 62 (55-70)<br>Dual: 59 (54-66) | Median (25th-75th percentile): 60 (55-67) | Median (25th-75th percentile): Anodal: 21 (8-44) months<br>Dual: 25 (9-38) months | Median (25th-75th percentile): 18 (12-33) months | Anodal: 20 min with 2 mA with 16 cm <sup>2</sup> anodal electrode over the M1 of the lesioned hemisphere<br>Dual: anodal + 20 min with 2 mA with 16 cm <sup>2</sup> cathodal electrode over the M1 of the non-lesioned hemisphere<br>Reference electrode position: over the contralateral supraorbital forehead<br>Treatment was delivered in 15 sessions during 3 weeks     | 2 mA for 1 min            | 15 sessions of physiotherapy and occupational therapy for 120 min during 3 weeks                                              | JTT, WMFT, Kocaeli Functional Evaluation Test          |
| Straudi et al., 2016 [37]         | RCT;<br>Dual: 12<br>Sham: 11                | 53 (16)                                                               | 64 (10)                                   | 41 (35) weeks                                                                     | 78 (62) weeks                                    | 30 min with 1 mA with 35 cm <sup>2</sup> anodal electrode over the M1 of the lesioned hemisphere and cathodal electrode over the M1 of the non-lesioned hemisphere                                                                                                                                                                                                           | Sham tDCS (1 mA for 30 s) | 30 min of robotic arm training with the REO device                                                                            | UE-FM, BBT, MAL, adverse-effects questionnaire         |
| Tedesco-Triccas et al., 2015 [35] | RCT;<br>Anodal: 12<br>Sham: 11              | 64 (10)                                                               | 63 (14)                                   | 25 (31) months                                                                    | 13 (16) months                                   | 20 min with 1 mA with anodal electrode over the M1 of the lesioned hemisphere<br>Reference electrode position: over the contralateral supraorbital forehead<br>Stimulation was delivered on 18 sessions                                                                                                                                                                      | Sham tDCS (1 mA for 20 s) | Robotic arm training with the ArmeoSpring device (60 min per session) for 18 sessions during 8 weeks (2 to 3 sessions a week) | UE-FM, ARAT, MAL, SIS 3.0                              |

|                         |                                                                                                                                     |         |         |                                                                                             |                   |                                                                                                                                                                                                                                                      |                                                       |                                                                                                               |                                         |
|-------------------------|-------------------------------------------------------------------------------------------------------------------------------------|---------|---------|---------------------------------------------------------------------------------------------|-------------------|------------------------------------------------------------------------------------------------------------------------------------------------------------------------------------------------------------------------------------------------------|-------------------------------------------------------|---------------------------------------------------------------------------------------------------------------|-----------------------------------------|
|                         |                                                                                                                                     |         |         |                                                                                             |                   | during 8 weeks (between 2 and 3 sessions per week)                                                                                                                                                                                                   |                                                       |                                                                                                               |                                         |
| Viana et al., 2014 [43] | RCT;<br>Anodal:<br>10<br>Sham: 10                                                                                                   | 56 (10) | 55 (12) | 32 (18)<br>months                                                                           | 35 (20)<br>months | 13 min with 1 mA with anodal electrode over the M1 of the lesioned hemisphere<br>Reference electrode position: over the contralateral supraorbital forehead<br>Stimulation was delivered 3 times a week for 5 weeks                                  | Sham tDCS (2 mA for 30 s)                             | Virtual reality training using Nintendo Wii aiming at arm movements, for 60 min                               | UE-FM, WMFT, MAS, hand-held dynamometry |
| Wang et al., 2014 [52]  | RCT;<br>Anodal<br>tDCS +<br>Placebo<br>methylphenidate: 3<br>Sham<br>tDCS +<br>methylphenidate: 3<br>Anodal +<br>methylphenidate: 3 | 54 (14) | 52 (9)  | Not explicitly stated, but all participants were enrolled between 1 and 4 weeks post stroke |                   | Dual: 20 min with 1 mA with 35 cm <sup>2</sup> with the anode over the M1 of the lesioned hemisphere and cathode over the M1 of the non-lesioned hemisphere<br>Reference electrode position: over contralateral M1<br>Stimulation was delivered once | Sham tDCS (1 mA for 10 s) and placebo methylphenidate | Placebo methylphenidate 1 hour prior to stimulation, active 20 mg methylphenidate 1 hour prior to stimulation | PPT, cortical excitability              |
| Wu et al., 2013 [36]    | RCT;<br>Cathodal:<br>45<br>Sham: 45                                                                                                 | 46 (11) | 49 (13) | 5 (3)<br>months                                                                             | 5 (3) months      | 20 min with 1.2 mA with 24.75 cm <sup>2</sup> cathodal electrode over the M1 of the non-lesioned hemisphere<br>Reference electrode position: over the shoulder on the unaffected side<br>Stimulation was delivered 5 days a week for 4 weeks         | Sham tDCS (1.2 mA for 30 s)                           | conventional physical therapy program for 30 min twice daily 5 days a week for 4 weeks                        | MAS, UE-FM, MBI                         |

ARAT: Action Research Arm Test, BBT: Box and Block Test, BI: Barthel Index, CIMT: constraint-induced movement therapy, CTL: Control group, EXP: Experimental group, JTT: Jebsen Taylor Hand Function Test, M1: primary motor cortex, mA: milliampere, MAL: Motor Activity Log Rating Scale, MAS: Modified Ashworth Scale, MBI: Modified Barthel Index, MI: Motricity Index, MIT: Massachusetts Institute of Technology, MRC: Medical Research Council, NIHSS: National Institute of Health Stroke Scale, OMCASS: Orgogozo MCA scale, PPT: Purdue Pegboard Test, RCT: randomised controlled trial, ROM: range of motion, RMI: Rivermead Mobility Index, SD: standard deviation, SIS: Stroke Impact Scale, tDCS: transcranial direct current stimulation, TUG: Timed Up and Go Test, UE-FM: Upper Extremity Fugl-Meyer Score, WMFT: Wolf Motor Function Test
