# Supplementary material for: Transcranial direct current stimulation (tDCS) for improving capacity in activities and arm function after stroke: a network meta-analysis of randomised controlled trials
Source: Springer Nature journal article supplement (doi:10.1186/s12984-017-0301-7), 2017-09-13
Supplement: MOESM3 [file 15056606]

Additional file 3: Risk of bias of included studies

|                       | Random sequence generation (selection bias) | Allocation concealment (selection bias) | Blinding of participants and personnel (performance bias): Subjective outcome measures | Blinding of participants and personnel (performance bias): Objective outcome measures | Blinding of outcome assessment (detection bias): Subjective outcome measures | Blinding of outcome assessment (detection bias): Objective outcome measures | Incomplete outcome data (attrition bias): Subjective outcome measures | Incomplete outcome data (attrition bias): Objective outcome measures | Selective reporting (reporting bias) |
|-----------------------|---------------------------------------------|-----------------------------------------|----------------------------------------------------------------------------------------|---------------------------------------------------------------------------------------|------------------------------------------------------------------------------|-----------------------------------------------------------------------------|-----------------------------------------------------------------------|----------------------------------------------------------------------|--------------------------------------|
| Bolognini 2011        | +                                           | ?                                       | ?                                                                                      | +                                                                                     | +                                                                            | +                                                                           | +                                                                     | ?                                                                    | ?                                    |
| Di Lazzaro 2014a      | +                                           | ?                                       | +                                                                                      | +                                                                                     | +                                                                            | +                                                                           | +                                                                     | +                                                                    | -                                    |
| Di Lazzaro 2014b      | +                                           | ?                                       | +                                                                                      | +                                                                                     | +                                                                            | +                                                                           | +                                                                     | +                                                                    | -                                    |
| Hesse 2011            | +                                           | +                                       | +                                                                                      | +                                                                                     | +                                                                            | +                                                                           | +                                                                     | +                                                                    | +                                    |
| Khedr 2013            | +                                           | +                                       | +                                                                                      | +                                                                                     | +                                                                            | +                                                                           | +                                                                     | +                                                                    | +                                    |
| Kim 2010              | +                                           | +                                       | +                                                                                      | +                                                                                     | +                                                                            | +                                                                           | ?                                                                     | ?                                                                    | ?                                    |
| Lee 2014              | +                                           | ?                                       | +                                                                                      | +                                                                                     | +                                                                            | +                                                                           | -                                                                     | -                                                                    | ?                                    |
| Qu 2009               | ?                                           | ?                                       | ?                                                                                      | +                                                                                     | ?                                                                            | +                                                                           | +                                                                     | +                                                                    | ?                                    |
| Rocha 2016            | +                                           | +                                       | ?                                                                                      | ?                                                                                     | +                                                                            | +                                                                           | +                                                                     | +                                                                    | ?                                    |
| Straudi 2016          | +                                           | ?                                       | ?                                                                                      | ?                                                                                     | +                                                                            | +                                                                           | +                                                                     | +                                                                    | ?                                    |
| Tedesco Triccas 2015b | +                                           | +                                       | ?                                                                                      | +                                                                                     | +                                                                            | +                                                                           | ?                                                                     | ?                                                                    | ?                                    |
| Wu 2013a              | +                                           | +                                       | +                                                                                      | +                                                                                     | +                                                                            | +                                                                           | +                                                                     | +                                                                    | +                                    |

Risk of bias summary of tDCS for improving activities

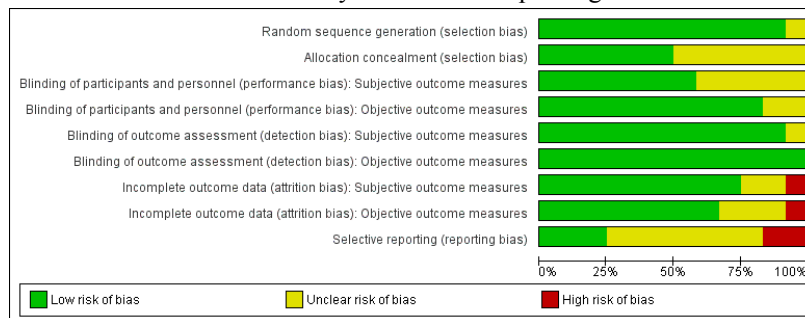

Risk of bias graph of tDCS for improving activities

|                       | Random sequence generation (selection bias) | Allocation concealment (selection bias) | Blinding of participants and personnel (performance bias): Subjective outcome measures | Blinding of participants and personnel (performance bias): Objective outcome measures | Blinding of outcome assessment (detection bias): Subjective outcome measures | Blinding of outcome assessment (detection bias): Objective outcome measures | Incomplete outcome data (attrition bias): Subjective outcome measures | Incomplete outcome data (attrition bias): Objective outcome measures | Selective reporting (reporting bias) |
|-----------------------|---------------------------------------------|-----------------------------------------|----------------------------------------------------------------------------------------|---------------------------------------------------------------------------------------|------------------------------------------------------------------------------|-----------------------------------------------------------------------------|-----------------------------------------------------------------------|----------------------------------------------------------------------|--------------------------------------|
| Allman 2016           | +                                           | ?                                       | +                                                                                      | +                                                                                     | +                                                                            | +                                                                           | ?                                                                     | ?                                                                    | ?                                    |
| Bolognini 2011        | +                                           | ?                                       | ?                                                                                      | +                                                                                     | +                                                                            | +                                                                           | +                                                                     | ?                                                                    | ?                                    |
| Cha 2014              | +                                           | ?                                       | +                                                                                      | ?                                                                                     | +                                                                            | ?                                                                           | +                                                                     | ?                                                                    | ?                                    |
| Fusco 2014            | +                                           | ?                                       | ?                                                                                      | +                                                                                     | +                                                                            | +                                                                           | -                                                                     | -                                                                    | ?                                    |
| Hesse 2011            | +                                           | +                                       | +                                                                                      | +                                                                                     | +                                                                            | +                                                                           | +                                                                     | +                                                                    | +                                    |
| Kim 2010              | +                                           | +                                       | +                                                                                      | +                                                                                     | +                                                                            | +                                                                           | ?                                                                     | ?                                                                    | ?                                    |
| Lee 2014              | +                                           | ?                                       | +                                                                                      | +                                                                                     | +                                                                            | +                                                                           | -                                                                     | -                                                                    | ?                                    |
| Lindenberg 2010       | +                                           | ?                                       | +                                                                                      | +                                                                                     | +                                                                            | +                                                                           | +                                                                     | ?                                                                    | ?                                    |
| Nair 2011             | ?                                           | ?                                       | +                                                                                      | +                                                                                     | +                                                                            | +                                                                           | +                                                                     | +                                                                    | -                                    |
| Rocha 2016            | +                                           | +                                       | ?                                                                                      | ?                                                                                     | +                                                                            | +                                                                           | +                                                                     | +                                                                    | ?                                    |
| Rossi 2013            | ?                                           | ?                                       | +                                                                                      | +                                                                                     | +                                                                            | +                                                                           | +                                                                     | +                                                                    | +                                    |
| Sattler 2015          | +                                           | ?                                       | +                                                                                      | +                                                                                     | +                                                                            | +                                                                           | +                                                                     | +                                                                    | ?                                    |
| Straudi 2016          | +                                           | ?                                       | ?                                                                                      | ?                                                                                     | +                                                                            | +                                                                           | +                                                                     | +                                                                    | ?                                    |
| Tedesco Triccas 2015b | +                                           | +                                       | ?                                                                                      | +                                                                                     | +                                                                            | +                                                                           | ?                                                                     | ?                                                                    | ?                                    |
| Viana 2014            | +                                           | +                                       | +                                                                                      | +                                                                                     | +                                                                            | +                                                                           | +                                                                     | +                                                                    | ?                                    |
| Wu 2013a              | +                                           | +                                       | +                                                                                      | +                                                                                     | +                                                                            | +                                                                           | +                                                                     | +                                                                    | +                                    |

Risk of bias summary of tDCS for improving arm function

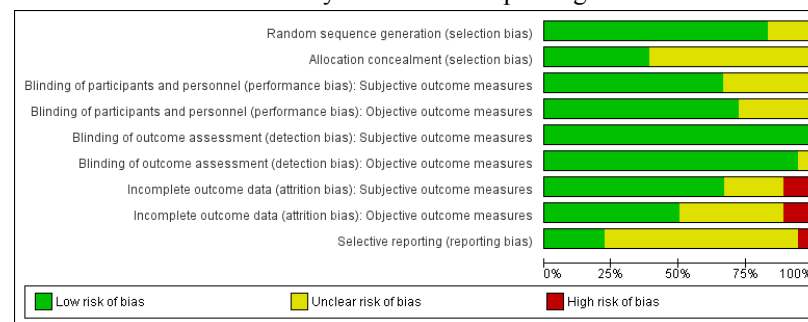

Risk of bias graph of tDCS for improving arm function

|                       | Random sequence generation (selection bias) | Allocation concealment (selection bias) | Blinding of participants and personnel (performance bias): Subjective outcome measures | Blinding of participants and personnel (performance bias): Objective outcome measures | Blinding of outcome assessment (detection bias): Subjective outcome measures | Blinding of outcome assessment (detection bias): Objective outcome measures | Incomplete outcome data (attrition bias): Subjective outcome measures | Incomplete outcome data (attrition bias): Objective outcome measures | Selective reporting (reporting bias) |
|-----------------------|---------------------------------------------|-----------------------------------------|----------------------------------------------------------------------------------------|---------------------------------------------------------------------------------------|------------------------------------------------------------------------------|-----------------------------------------------------------------------------|-----------------------------------------------------------------------|----------------------------------------------------------------------|--------------------------------------|
| Allman 2016           | +                                           | ?                                       | +                                                                                      | +                                                                                     | +                                                                            | +                                                                           | ?                                                                     | ?                                                                    | ?                                    |
| Ang 2012              | +                                           | ?                                       | +                                                                                      | +                                                                                     | +                                                                            | +                                                                           | +                                                                     | +                                                                    | ?                                    |
| Boggio 2007a          | ?                                           | ?                                       | +                                                                                      | +                                                                                     | +                                                                            | +                                                                           | +                                                                     | +                                                                    | ?                                    |
| Bolognini 2011        | +                                           | ?                                       | ?                                                                                      | +                                                                                     | +                                                                            | +                                                                           | +                                                                     | ?                                                                    | ?                                    |
| Cha 2014              | +                                           | ?                                       | +                                                                                      | ?                                                                                     | +                                                                            | ?                                                                           | +                                                                     | ?                                                                    | ?                                    |
| Di Lazzaro 2014a      | +                                           | ?                                       | +                                                                                      | +                                                                                     | +                                                                            | +                                                                           | +                                                                     | +                                                                    | -                                    |
| Di Lazzaro 2014b      | +                                           | ?                                       | +                                                                                      | +                                                                                     | +                                                                            | +                                                                           | +                                                                     | +                                                                    | -                                    |
| Fusco 2013a           | +                                           | +                                       | ?                                                                                      | +                                                                                     | -                                                                            | ?                                                                           | +                                                                     | +                                                                    | ?                                    |
| Fusco 2014            | +                                           | ?                                       | ?                                                                                      | +                                                                                     | +                                                                            | +                                                                           | -                                                                     | -                                                                    | ?                                    |
| Hesse 2011            | +                                           | +                                       | +                                                                                      | +                                                                                     | +                                                                            | +                                                                           | +                                                                     | +                                                                    | +                                    |
| Khedr 2013            | +                                           | +                                       | +                                                                                      | +                                                                                     | +                                                                            | +                                                                           | +                                                                     | +                                                                    | +                                    |
| Kim 2010              | +                                           | +                                       | +                                                                                      | +                                                                                     | +                                                                            | +                                                                           | ?                                                                     | ?                                                                    | ?                                    |
| Lee 2014              | +                                           | ?                                       | +                                                                                      | +                                                                                     | +                                                                            | +                                                                           | -                                                                     | -                                                                    | ?                                    |
| Lindenberg 2010       | +                                           | ?                                       | +                                                                                      | +                                                                                     | +                                                                            | +                                                                           | +                                                                     | ?                                                                    | ?                                    |
| Mortensen 2016        | +                                           | +                                       | ?                                                                                      | ?                                                                                     | +                                                                            | +                                                                           | +                                                                     | +                                                                    | +                                    |
| Nair 2011             | ?                                           | ?                                       | +                                                                                      | +                                                                                     | +                                                                            | +                                                                           | +                                                                     | +                                                                    | -                                    |
| Qu 2009               | ?                                           | ?                                       | ?                                                                                      | +                                                                                     | ?                                                                            | +                                                                           | +                                                                     | +                                                                    | ?                                    |
| Rocha 2016            | +                                           | +                                       | ?                                                                                      | ?                                                                                     | +                                                                            | +                                                                           | +                                                                     | +                                                                    | ?                                    |
| Rossi 2013            | ?                                           | ?                                       | +                                                                                      | +                                                                                     | +                                                                            | +                                                                           | +                                                                     | +                                                                    | +                                    |
| Sattler 2015          | +                                           | ?                                       | +                                                                                      | +                                                                                     | +                                                                            | +                                                                           | +                                                                     | +                                                                    | ?                                    |
| Sik 2015              | ?                                           | ?                                       | ?                                                                                      | ?                                                                                     | ?                                                                            | ?                                                                           | +                                                                     | +                                                                    | ?                                    |
| Straudi 2016          | +                                           | ?                                       | ?                                                                                      | ?                                                                                     | +                                                                            | +                                                                           | +                                                                     | +                                                                    | ?                                    |
| Tedesco Triccas 2015b | +                                           | +                                       | ?                                                                                      | +                                                                                     | +                                                                            | +                                                                           | ?                                                                     | ?                                                                    | ?                                    |
| Viana 2014            | +                                           | +                                       | +                                                                                      | +                                                                                     | +                                                                            | +                                                                           | +                                                                     | +                                                                    | ?                                    |
| Wang 2014             | ?                                           | ?                                       | +                                                                                      | +                                                                                     | +                                                                            | +                                                                           | +                                                                     | ?                                                                    | ?                                    |
| Wu 2013a              | +                                           | +                                       | +                                                                                      | +                                                                                     | +                                                                            | +                                                                           | +                                                                     | +                                                                    | +                                    |

Risk of bias summary of the acceptability of tDCS

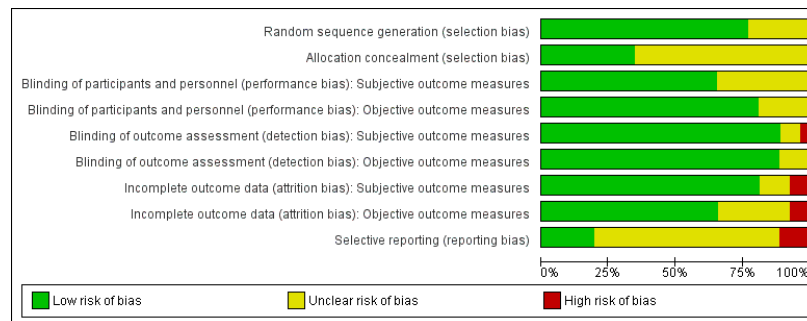

Risk of bias graph of the acceptability of tDCS
