# Supplementary material for: Transcranial direct current stimulation (tDCS) for improving capacity in activities and arm function after stroke: a network meta-analysis of randomised controlled trials
Source: Springer Nature journal article supplement (doi:10.1186/s12984-017-0301-7), 2017-09-13
Supplement: MOESM4 [file 15056606]

**Additional file 4: presentation of outcome data, by included study**

**tDCS for improving activities after stroke**

| Study                        | Assessment used | Anodal tDCS |                        | Cathodal tDCS |                        | Dual tDCS |                        | Sham tDCS   |                        | Active control |                        |
|------------------------------|-----------------|-------------|------------------------|---------------|------------------------|-----------|------------------------|-------------|------------------------|----------------|------------------------|
|                              |                 | Mean (SD)   | Participants, <i>n</i> | Mean (SD)     | Participants, <i>n</i> | Mean (SD) | Participants, <i>n</i> | Mean (SD)   | Participants, <i>n</i> | Mean (SD)      | Participants, <i>n</i> |
| Bolognini et al., 2011       | MAL-QOM         | 2.0 (3.97)  | 10                     |               |                        |           |                        | 2.5 (1.98)  | 11                     |                |                        |
| DiLazzaro et al., 2014a      | mRS             |             |                        |               |                        | 3.0 (1)   | 7                      | 3.0 (1.3)   | 7                      |                |                        |
| DiLazzaro et al., 2014b      | mRS             |             |                        |               |                        | 2.4 (1.2) | 10                     | 3.1 (1.4)   | 10                     |                |                        |
| Hesse et al., 2011           | BI              | 53.6 (14.5) | 32                     | 59.2 (12.4)   | 32                     |           |                        | 56.3 (15.5) | 32                     |                |                        |
| Khedr et al., 2013           | BI              | 52 (30)     | 14                     | 52 (18)       | 13                     |           |                        | 41 (18)     | 13                     |                |                        |
| Kim et al., 2010             | mBI             | 78 (14)     | 7                      | 93 (18)       | 6                      |           |                        | 73 (19)     | 7                      |                |                        |
| Lee et al., 2014             | mBI             |             |                        | 69.9 (16.6)   | 42 (21+21)*            |           |                        |             |                        | 64.3 (24.5)    | 20                     |
| Qu et al., 2009              | BI              |             |                        | 74 (16)       | 25                     |           |                        | 74 (20)     | 25                     |                |                        |
| Rocha et al., 2016           | MAL-QOM         | 3.19 (1.0)  | 7                      | 3.19 (1.2)    | 7                      |           |                        | 2.65 (0.6)  | 7                      |                |                        |
| Straudi et al., 2016         | MAL-QOM         | 1.05( 1.43) | 12                     |               |                        |           |                        | 0.85 (1.50) | 11                     |                |                        |
| Tedesco-Triccas et al., 2015 | MAL-QOM         | 1.2 (2.1)   | 12                     |               |                        |           |                        | 1.6 (1.8)   | 11                     |                |                        |
| Wu et al., 2013              | MBI             |             |                        | 76.2 (19.6)   | 45                     |           |                        | 65.4 (20.4) | 45                     |                |                        |

\*Groups with similar interventions have been combined in a single group. BI: Barthel Index, MAL-QOM: Motor Activity Log Rating Scale, Quality of Movement subscale, MAL-AOU: Motor Activity Log Rating Scale, amount of use subscale, MAS: Modified Ashworth Scale, mBI: Modified Barthel Index, MI: Motricity Index, NIHSS: National Institute of Health Stroke Scale, OMCASS: Orgogozo MCA scale, RMI: Rivermead Mobility Index, SD: standard deviation, SIS: Stroke Impact Scale, tDCS: transcranial direct current stimulation

### tDCS for improving arm function after stroke

| Study                        | Assessment used    | Anodal tDCS |                        | Cathodal tDCS |                        | Dual tDCS   |                        | Sham tDCS    |                        | Active control |                        |
|------------------------------|--------------------|-------------|------------------------|---------------|------------------------|-------------|------------------------|--------------|------------------------|----------------|------------------------|
|                              |                    | Mean (SD)   | Participants, <i>n</i> | Mean (SD)     | Participants, <i>n</i> | Mean (SD)   | Participants, <i>n</i> | Mean (SD)    | Participants, <i>n</i> | Mean (SD)      | Participants, <i>n</i> |
| Allman et al., 2016          | UE-FM              | 50.4 (11.2) | 11                     |               |                        |             |                        | 45.5 (14.6)  | 13                     |                |                        |
| Bolognini et al., 2011       | UE-FM              | 32 (37)     | 10                     |               |                        |             |                        | 30 (33)      | 11                     |                |                        |
| Cha et al., 2014             | UE-FM              | 48.7 (12.5) | 10                     |               |                        |             |                        |              |                        | 29.7 (9.2)     | 10                     |
| Fusco et al., 2014           | UE-FM change score |             |                        | 4 (5)         | 5                      |             |                        | 4 (7)        | 6                      |                |                        |
| Hesse et al., 2011           | UE-FM              | 19.1 (14.4) | 32                     | 18.9 (10.5)   | 32                     |             |                        | 19.2 (15.0)  | 32                     |                |                        |
| Kim et al., 2010             | UE-FM              | 56.7 (6.6)  | 7                      | 61.0 (3.5)    | 6                      |             |                        | 41 (16.5)    | 7                      |                |                        |
| Lee et al., 2014             | UE-FM              |             |                        | 45.4 (22.3)   | 42 (21+21)*            |             |                        |              |                        | 41.6 (21.3)    | 20                     |
| Lindenberg et al., 2010      | UE-FM              |             |                        |               |                        | 43.8 (12.3) | 10                     | 41.0 (11.8)  | 10                     |                |                        |
| Nair et al., 2011            | UE-FM              |             |                        | 33.7 (12.9)   | 7                      |             |                        | 32.3 (9.8)   | 7                      |                |                        |
| Rocha et al., 2016           | UE-FM              | 11.2 (1.0)  | 7                      | 7.3 (1.6)     | 7                      |             |                        | 3.9 (2.3)    | 7                      |                |                        |
| Rossi et al., 2013           | UE-FM              | 7.5 (10.1)  | 25                     |               |                        |             |                        | 9.6 (10.3)   | 25                     |                |                        |
| Sattler et al., 2015         | UE-FM change score | 6.6 (4.2)   | 10                     |               |                        |             |                        | 9 (6.2)      | 10                     |                |                        |
| Straudi et al., 2016         | UE-FM              | 28.5 (19.0) | 12                     |               |                        |             |                        | 26.6 (16.12) | 11                     |                |                        |
| Tedesco-Triccas et al., 2015 | UE-FM              | 33.6 (16.3) | 12                     |               |                        |             |                        | 44.8 (16.3)  | 11                     |                |                        |
| Viana et al., 2014           | UE-FM              | 50.6 (13.4) | 10                     |               |                        |             |                        | 46.9 (12.4)  | 10                     |                |                        |
| Wu et al., 2013              | UE-FM              | 22.3 (7.9)  | 45                     |               |                        |             |                        | 14.6 (9.1)   | 45                     |                |                        |

\*Groups with similar interventions have been combined in a single group. ARAT: Action Research Arm Test, BBT: Box and Block Test, CIMT: constraint-induced movement therapy, UE-FM: Upper Extremity Fugl-Meyer Score

**Safety of tDCS for improving activities or arm function after stroke, measured by number of dropouts and adverse events**

| Study                        | Anodal tDCS      |                        | Cathodal tDCS    |                        | Dual tDCS        |                        | Sham tDCS        |                        | Active control   |                        |
|------------------------------|------------------|------------------------|------------------|------------------------|------------------|------------------------|------------------|------------------------|------------------|------------------------|
|                              | Events, <i>n</i> | Participants, <i>n</i> | Events, <i>n</i> | Participants, <i>n</i> | Events, <i>n</i> | Participants, <i>n</i> | Events, <i>n</i> | Participants, <i>n</i> | Events, <i>n</i> | Participants, <i>n</i> |
| Allman et al., 2016          | 2                | 13                     |                  |                        |                  |                        | 0                | 13                     |                  |                        |
| Ang et al., 2012             | 0                | 10                     |                  |                        |                  |                        | 0                | 9                      |                  |                        |
| Bolognini et al., 2011       | 3                | 9                      |                  |                        |                  |                        | 2                | 10                     |                  |                        |
| Cha et al., 2014             | 0                | 10                     |                  |                        |                  |                        |                  |                        | 0                | 10                     |
| DiLazzaro et al., 2014a      |                  |                        |                  |                        | 0                | 7                      | 0                | 7                      |                  |                        |
| DiLazzaro et al., 2014b      |                  |                        |                  |                        | 0                | 10                     | 0                | 10                     |                  |                        |
| Fusco et al., 2013           | 0                | 2                      | 0                | 1                      | 0                | 2                      | 0                | 4                      |                  |                        |
| Fusco et al., 2014           |                  |                        | 2                | 7                      |                  |                        | 1                | 7                      |                  |                        |
| Hesse et al., 2011           | 1                | 32                     | 0                | 32                     | 0                | 32                     |                  |                        |                  |                        |
| Khedr et al., 2013           | 0                | 14                     | 0                | 13                     |                  |                        | 0                | 13                     |                  |                        |
| Kim et al., 2010             | 1                | 7                      | 1                | 6                      |                  |                        | 0                | 7                      |                  |                        |
| Lee et al., 2014             |                  |                        | 3                | 42 (21+21)*            |                  |                        |                  |                        | 1                | 21                     |
| Lindenberg et al., 2010      |                  |                        |                  |                        | 0                | 10                     | 0                | 10                     |                  |                        |
| Mortensen et al., 2016       | 0                | 8                      |                  |                        |                  |                        | 1                | 7                      |                  |                        |
| Nair et al., 2011            |                  |                        | 0                | 7                      |                  |                        | 0                | 7                      |                  |                        |
| Qu et al., 2009              |                  |                        | 0                | 25                     |                  |                        | 0                | 25                     |                  |                        |
| Rocha et al., 2016           |                  | 7                      | 0                | 7                      |                  |                        | 0                | 7                      |                  |                        |
| Rossi et al., 2013           | 0                | 25                     |                  |                        |                  |                        | 0                | 25                     |                  |                        |
| Sattler et al., 2015         | 0                | 10                     |                  |                        |                  |                        | 0                | 10                     |                  |                        |
| Sik et al., 2015             | 2                | 12                     |                  |                        | 2                | 12                     | 1                | 12                     |                  |                        |
| Straudi et al., 2016         | 3                | 12                     |                  |                        |                  |                        | 2                | 11                     |                  |                        |
| Tedesco-Triccas et al., 2015 | 6                | 12                     |                  |                        |                  |                        | 0                | 11                     |                  |                        |
| Viana et al., 2014           | 0                | 10                     |                  |                        |                  |                        | 0                | 10                     |                  |                        |
| Wang et al., 2014            | 0                | 3                      |                  |                        |                  |                        | 0                | 3                      |                  |                        |
| Wu et al., 2013              | 0                | 45                     |                  |                        |                  |                        | 0                | 45                     |                  |                        |

\*Groups with similar interventions have been combined in a single group.
