# Supplementary material for: Transcranial direct current stimulation (tDCS) for improving capacity in activities and arm function after stroke: a network meta-analysis of randomised controlled trials
Source: Springer Nature journal article supplement (doi:10.1186/s12984-017-0301-7), 2017-09-13
Supplement: MOESM6 [file 15056606]

*Additional file 6: Results of sensitivity analyses*

**Results of sensitivity analysis regarding methodological quality for our primary outcome (activities)**

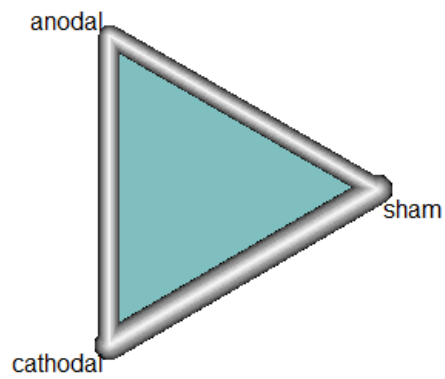

Network graph of tDCS for improving activities after stroke. The thicker the edge, the lower the standard error of this comparison. Coloured polygons indicate multi-arm studies.

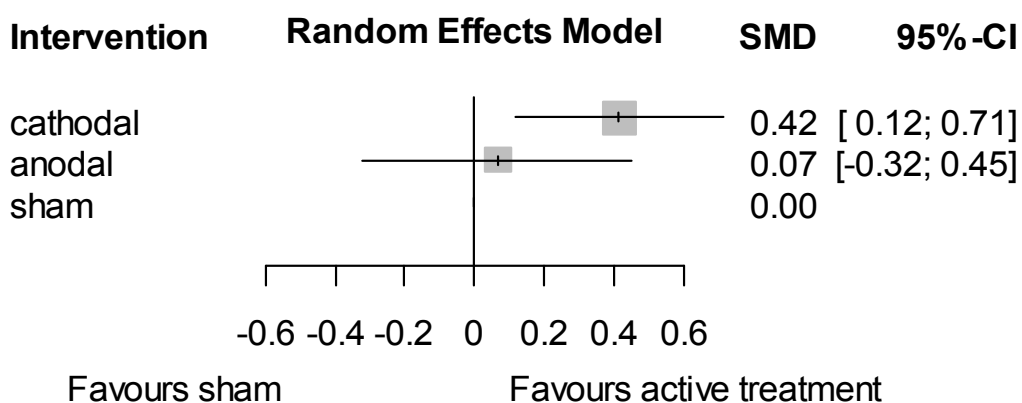

Forest plot of tDCS for improving ADL capacity after stroke (four studies with 247 participants). Treatments are listed in order of relative ranking. SMD = standardised mean difference, CI = confidence interval. Sham is the reference category.

Table AF5-1: treatment rankings by P-score of tDCS for improving ADL capacity (only studies with proper allocation concealment, blinding of outcome assessor, and intention-to-treat analysis)

| Treatment | P-Score |
|-----------|---------|
| Cathodal  | 0.98    |
| Anodal    | 0.41    |
| Sham      | 0.12    |

Treatments are listed in order of relative ranking. The P-Score describes the mean level of certainty about a particular treatment being better than another treatment.

#### Results of sensitivity analysis regarding the choice of fixed- or random-effects model

No systematic differences between a fixed- or random-effects model could be detected in our analyses by visually inspecting Bland-Altman plots.

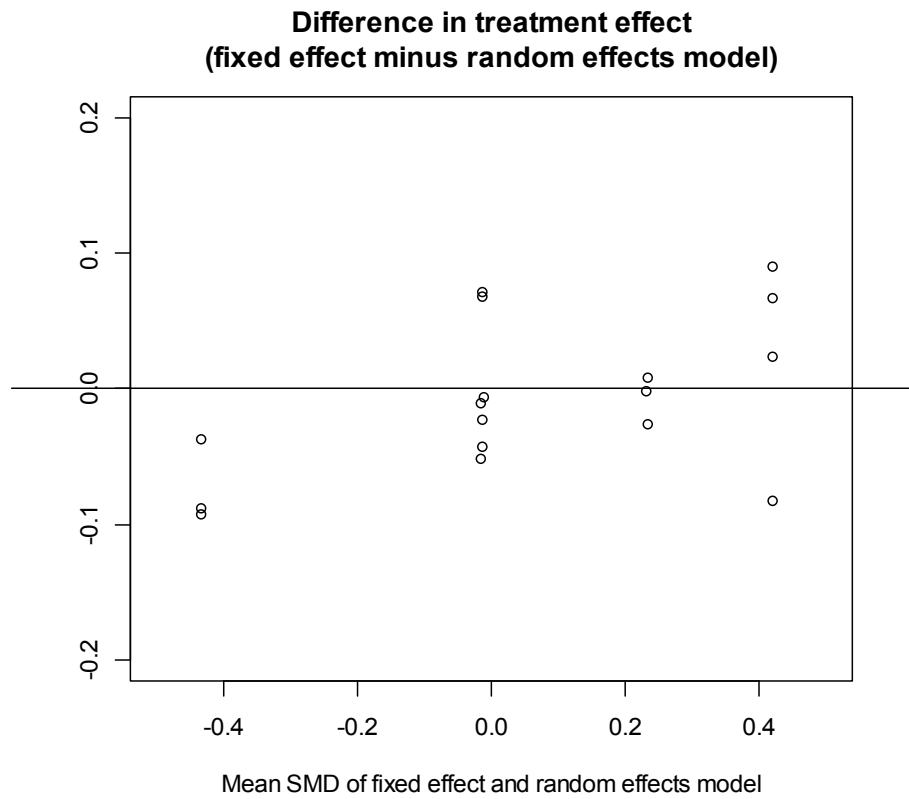

Bland-Altman plot of differences between fixed- and random-effects model in the treatment effects of tDCS for improving ADL capacity after stroke. Each circle represents a pairwise comparison.

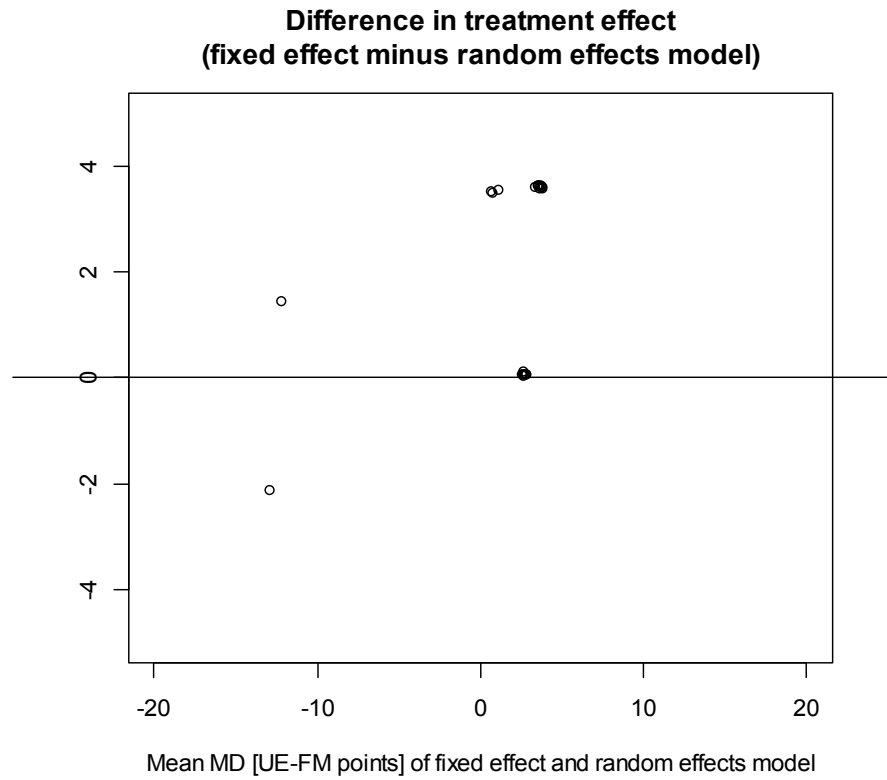

Bland-Altman plot of differences between fixed- and random-effects model in the treatment effects of tDCS for improving arm function after stroke (measured by UE-FM). UE-FM: Upper Extremity Fugl-Meyer Assessment. Each circle represents a pairwise comparison.
