# Supplementary material for: Transcranial direct current stimulation (tDCS) for improving capacity in activities and arm function after stroke: a network meta-analysis of randomised controlled trials
Source: Springer Nature journal article supplement (doi:10.1186/s12984-017-0301-7), 2017-09-13
Supplement: MOESM7 [file 15056606]

**Additional file 7: Results of post-hoc meta-regression regarding publication year, time post-stroke, applied current [mA], duration of stimulation session [min], number of stimulation sessions, electrode size [cm<sup>2</sup>], current density [mA/cm<sup>2</sup>], electric charge per session [C], and electric charge density per session [C/cm<sup>2</sup>]**

**Meta-regression on primary outcome, ADL capacity**

Extracted and calculated data from included sham-controlled trials examining the effects of tDCS on ADL capacity.

| Study ID, Publication Year | Treatment         | Time since stroke [months] | Applied current [mA] | Duration of stimulation session [min] | Number of stimulation sessions | Electrode size [cm <sup>2</sup> ] | Current density [mA/cm <sup>2</sup> ] | Charge per session [C] | Charge density per session [C/cm <sup>2</sup> ] |
|----------------------------|-------------------|----------------------------|----------------------|---------------------------------------|--------------------------------|-----------------------------------|---------------------------------------|------------------------|-------------------------------------------------|
| Bolognini 2011             | anodal vs. sham   | 35.21                      | 2                    | 40                                    | 10                             | 35                                | 0.06                                  | 4.8                    | 0.14                                            |
| DiLazzaro 2014a            | dual vs. sham     | 0.09                       | 2                    | 40                                    | 5                              | 35                                | 0.06                                  | 4.8                    | 0.14                                            |
| DiLazzaro 2014b            | dual vs. sham     | 0.11                       | 2                    | 40                                    | 5                              | 35                                | 0.06                                  | 4.8                    | 0.14                                            |
| Hesse 2011                 | anodal vs. sham   | 0.83                       | 2                    | 20                                    | 30                             | 35                                | 0.06                                  | 2.4                    | 0.07                                            |
| Hesse 2011                 | cathodal vs. sham | 0.87                       | 2                    | 20                                    | 30                             | 35                                | 0.06                                  | 2.4                    | 0.07                                            |
| Khedr 2013                 | anodal vs. sham   | 0.43                       | 2                    | 25                                    | 6                              | 35                                | 0.06                                  | 3.0                    | 0.09                                            |
| Khedr 2013                 | cathodal vs. sham | 0.41                       | 2                    | 25                                    | 6                              | 35                                | 0.06                                  | 3.0                    | 0.09                                            |
| Kim 2010                   | anodal vs. sham   | 0.92                       | 2                    | 20                                    | 10                             | 25                                | 0.08                                  | 2.4                    | 0.10                                            |
| Kim 2010                   | cathodal vs. sham | 0.70                       | 2                    | 20                                    | 10                             | 25                                | 0.08                                  | 2.4                    | 0.10                                            |
| Rocha 2016                 | anodal vs. sham   | 27.00                      | 1                    | 13                                    | 20                             | 35                                | 0.03                                  | 0.8                    | 0.02                                            |
| Rocha 2016                 | cathodal vs. sham | 30.35                      | 1                    | 9                                     | 20                             | 35                                | 0.03                                  | 0.5                    | 0.02                                            |
| Straudi 2016               | dual vs. sham     | 13.49                      | 1                    | 30                                    | 10                             | 35                                | 0.03                                  | 1.8                    | 0.05                                            |
| Tedesco-Triccas 2015       | anodal vs. sham   | 19.61                      | 1                    | 20                                    | 18                             | 35                                | 0.03                                  | 1.2                    | 0.03                                            |
| Wu 2013                    | cathodal vs. sham | 4.90                       | 1.2                  | 20                                    | 20                             | 24.75                             | 0.05                                  | 1.4                    | 0.06                                            |

C: Coulomb; cm<sup>2</sup>: square centimetre; mA: milliampere, min: minutes, SE: standard error

Variables derived from meta-regression model of tDCS for improving ADL capacity.

| Variable                                                | $\beta$  | SE      | P Value |
|---------------------------------------------------------|----------|---------|---------|
| Intercept                                               | -1274.10 | 1257.51 | 0.31    |
| Publication year                                        | 0.63     | 0.62    | 0.31    |
| Time since stroke [months]                              | 0.04     | 0.05    | 0.44    |
| Applied current [mA]                                    | 2.05     | 5.17    | 0.69    |
| Duration of stimulation session [min]                   | 0.08     | 0.15    | 0.58    |
| Number of stimulation sessions                          | 0.02     | 0.04    | 0.69    |
| Electrode size [cm <sup>2</sup> ]                       | -0.11    | 0.26    | 0.67    |
| Current density [mA/cm <sup>2</sup> ]                   | 90.41    | 171.02  | 0.60    |
| Charge per session [C]                                  | -0.50    | 2.84    | 0.86    |
| Charge density per session [C/cm <sup>2</sup> *session] | -22.72   | 120.70  | 0.85    |

C: Coulomb; cm<sup>2</sup>: square centimetre; mA: milliampere, min: minutes, SE: standard error

**Meta-regression on secondary outcome, arm function.**

Extracted and calculated data from included sham-controlled trials examining the effects of tDCS on arm function as measured by Upper Extremity Fugl-Meyer assessment.

| Study-ID, Publication Year | Treatment         | Time since stroke [months] | Applied current [mA] | Duration of stimulation session [min] | Number of stimulation sessions | Electrode size [cm <sup>2</sup> ] | Current density [mA/cm <sup>2</sup> ] | Charge per session [C] | Charge density per session [C/cm <sup>2</sup> ] |
|----------------------------|-------------------|----------------------------|----------------------|---------------------------------------|--------------------------------|-----------------------------------|---------------------------------------|------------------------|-------------------------------------------------|
| Allman 2016                | anodal vs. sham   | 54.13                      | 1                    | 20                                    | 9                              | 35                                | 0.03                                  | 1.2                    | 0.03                                            |
| Bolognini 2011             | anodal vs. sham   | 35.21                      | 2                    | 40                                    | 10                             | 35                                | 0.06                                  | 4.8                    | 0.14                                            |
| Fusco 2014                 | cathodal vs. sham | 0.63                       | 1.5                  | 10                                    | 10                             | 35                                | 0.04                                  | 0.9                    | 0.03                                            |
| Hesse 2011                 | anodal vs. sham   | 0.83                       | 2                    | 20                                    | 30                             | 35                                | 0.06                                  | 2.4                    | 0.07                                            |
| Hesse 2011                 | cathodal vs. sham | 0.87                       | 2                    | 20                                    | 30                             | 35                                | 0.06                                  | 2.4                    | 0.07                                            |
| Kim 2010                   | anodal vs. sham   | 0.92                       | 2                    | 20                                    | 10                             | 25                                | 0.08                                  | 2.4                    | 0.10                                            |
| Kim 2010                   | cathodal vs. sham | 0.70                       | 2                    | 20                                    | 10                             | 25                                | 0.08                                  | 2.4                    | 0.10                                            |
| Lindenberg 2010            | dual vs. sham     | 35.40                      | 1.5                  | 30                                    | 5                              | 16.3                              | 0.09                                  | 2.7                    | 0.17                                            |
| Nair 2011                  | cathodal vs. sham | 30.50                      | 1                    | 30                                    | 5                              | NA                                | NA                                    | 1.8                    | NA                                              |
| Rocha 2016                 | anodal vs. sham   | 27.00                      | 1                    | 13                                    | 20                             | 35                                | 0.03                                  | 0.8                    | 0.02                                            |
| Rocha 2016                 | cathodal vs. sham | 30.35                      | 1                    | 9                                     | 20                             | 35                                | 0.03                                  | 0.5                    | 0.02                                            |
| Rossi 2013                 | anodal vs. sham   | 0.32                       | 2                    | 20                                    | 5                              | 35                                | 0.06                                  | 2.4                    | 0.07                                            |
| Sattler 2015               | anodal vs. sham   | 0.18                       | 1.2                  | 13                                    | 5                              | 35                                | 0.03                                  | 0.9                    | 0.03                                            |
| Straudi 2016               | dual vs. sham     | 13.49                      | 1                    | 30                                    | 10                             | 35                                | 0.03                                  | 1.8                    | 0.05                                            |
| Tedesco-Triccas 2015       | anodal vs. sham   | 19.61                      | 1                    | 20                                    | 18                             | 35                                | 0.03                                  | 1.2                    | 0.03                                            |
| Viana2014                  | anodal vs. sham   | 33.45                      | 2                    | 13                                    | 15                             | 35                                | 0.06                                  | 1.6                    | 0.04                                            |
| Wu 2013                    | cathodal vs. sham | 4.90                       | 1.2                  | 20                                    | 20                             | 24.75                             | 0.05                                  | 1.4                    | 0.06                                            |

C: Coulomb; cm<sup>2</sup>: square centimetre; mA: milliampere, min: minutes, NA: not available, SE: standard error

Variables derived from meta-regression model of tDCS for improving arm function.

| Variable                                                | $\beta$  | SE      | P Value |
|---------------------------------------------------------|----------|---------|---------|
| Intercept                                               | -3537.66 | 7120.91 | 0.62    |
| Publication year                                        | 1.79     | 3.54    | 0.61    |
| Time since stroke [months]                              | 0.16     | 0.14    | 0.27    |
| Applied current [mA]                                    | 29.92    | 33.66   | 0.37    |
| Duration of stimulation session [min]                   | -0.29    | 0.89    | 0.74    |
| Number of stimulation sessions                          | 0.17     | 0.29    | 0.54    |
| Electrode size [cm <sup>2</sup> ]                       | -2.57    | 1.32    | 0.05    |
| Current density [mA/cm <sup>2</sup> ]                   | -758.41  | 865.13  | 0.38    |
| Charge per session [C]                                  | 4.83     | 14.45   | 0.74    |
| Charge density per session [C/cm <sup>2</sup> *session] | -38.66   | 292.23  | 0.89    |

C: Coulomb; cm<sup>2</sup>: square centimetre; mA: milliampere, min: minutes, SE: standard error
